# Supplementary material
Source: PubMed Central journal article supplement (PMC8764749)
Supplement: NIHMS1707607-supplement-Supplementary_Information_file.pdf [file NIHMS1707607-supplement-Supplementary_Information_file.pdf]

1 **Supplementary Table 1.** Bacterial strains and plasmids used in this study.

| Strain | Description                                                                                                 | Source     |
|--------|-------------------------------------------------------------------------------------------------------------|------------|
| ZG1307 | ( <i>Vc</i> ) C6706                                                                                         | 50         |
| S17-1  | <i>E. coli</i> used for cloning and plasmid conjugal transfer                                               | 51         |
| ZG1609 | ( <i>Vc</i> ) C6706 $\Delta$ <i>crvA</i>                                                                    | 13         |
| ZG1610 | ( <i>Vc</i> ) C6706 $\Delta$ <i>crvB</i>                                                                    | This study |
| ZG1611 | ( <i>Vc</i> ) C6706 $\Delta$ <i>crvAB</i>                                                                   | This study |
| ZG1612 | ( <i>Vc</i> ) $\Delta$ <i>crvA</i> +pEV5143::P <sub>tet</sub> - <i>crvA</i>                                 | This study |
| ZG1613 | ( <i>Vc</i> ) $\Delta$ <i>crvB</i> +pEV5143::P <sub>tet</sub> - <i>crvA</i>                                 | This study |
| ZG1614 | ( <i>Vc</i> ) $\Delta$ <i>crvAB</i> +pEV5143::P <sub>tet</sub> - <i>crvA</i>                                | This study |
| ZG1615 | ( <i>Vc</i> ) $\Delta$ <i>crvA</i> +pEV5143 EV                                                              | This study |
| ZG1616 | ( <i>Vc</i> ) $\Delta$ <i>crvB</i> +pEV5143 EV                                                              | This study |
| ZG1617 | ( <i>Vc</i> ) $\Delta$ <i>crvAB</i> +pEV5143 EV                                                             | This study |
| ZG1618 | ( <i>Vc</i> ) $\Delta$ <i>crvA</i> +pEV5143::P <sub>tet</sub> - <i>crvAB</i>                                | This study |
| ZG1619 | ( <i>Vc</i> ) $\Delta$ <i>crvB</i> +pEV5143::P <sub>tet</sub> - <i>crvAB</i>                                | This study |
| ZG1620 | ( <i>Vc</i> ) $\Delta$ <i>crvAB</i> +pEV5143::P <sub>tet</sub> - <i>crvAB</i>                               | This study |
| ZG1621 | ( <i>Ec</i> ) MG1655                                                                                        | 52         |
| ZG1622 | ( <i>Ec</i> ) MG1655+pEV5143::P <sub>tet</sub> - <i>crvAB</i>                                               | This study |
| ZG1623 | ( <i>Ec</i> ) MG1655+pEV5143 EV                                                                             | This study |
| ZG1624 | ( <i>Pa</i> ) PA14                                                                                          | 53         |
| ZG1625 | ( <i>Pa</i> ) PA14+pUCP18::P <sub>tet</sub> - <i>crvAB</i>                                                  | This study |
| ZG1626 | ( <i>Pa</i> ) PA14+ pUCP18 EV                                                                               | This study |
| ZG1627 | ( <i>Cc</i> ) CB15N                                                                                         | 54         |
| ZG1628 | ( <i>Cc</i> ) CB15N+pRXMCS-6 EV                                                                             | This study |
| ZG1629 | ( <i>Cc</i> ) CB15N+pRXMCS-6::P <sub>tet</sub> - <i>crvAB</i>                                               | This study |
| ZG1630 | ( <i>Cc</i> ) CB15N $\Delta$ <i>creS</i>                                                                    | 55         |
| ZG1631 | ( <i>Cc</i> ) $\Delta$ <i>creS</i> +pRXMCS-6 EV                                                             | This study |
| ZG1632 | ( <i>Cc</i> ) $\Delta$ <i>creS</i> +pRXMCS-6::P <sub>tet</sub> - <i>crvAB</i>                               | This study |
| ZG1633 | ( <i>At</i> ) C58                                                                                           | 56         |
| ZG1634 | ( <i>At</i> ) C58+pRXMCS-6 EV                                                                               | This study |
| ZG1635 | ( <i>At</i> ) C58+pRXMCS-6::P <sub>tet</sub> - <i>crvAB</i>                                                 | This study |
| ZG1636 | ( <i>Vc</i> ) <i>crvA</i> - <i>msfGFP</i>                                                                   | This study |
| ZG1637 | ( <i>Vc</i> ) <i>crvA</i> - <i>mCherry</i>                                                                  | This study |
| ZG1638 | ( <i>Vc</i> ) <i>crvB</i> - <i>msfGFP</i>                                                                   | This study |
| ZG1639 | ( <i>Vc</i> ) <i>crvA</i> - <i>mCherry</i> ; <i>crvB</i> - <i>msfGFP</i>                                    | This study |
| ZG1640 | ( <i>Ec</i> ) MG1655+pEV5143::P <sub>tet</sub> - <i>crvA</i> - <i>mCherry</i> - <i>crvB</i> - <i>msfGFP</i> | This study |
| ZG1641 | ( <i>Vc</i> ) <i>crvA</i> - <i>msfGFP</i> +pEV5143::P <sub>tet</sub> -SS <sub>VcdsbA</sub> - <i>mCherry</i> | This study |
| ZG1642 | ( <i>Vc</i> ) <i>crvB</i> - <i>msfGFP</i> +pEV5143::P <sub>tet</sub> -SS <sub>VcdsbA</sub> - <i>mCherry</i> | This study |
| ZG1643 | ( <i>Vc</i> ) <i>crvB</i> - <i>msfGFP</i> ; $\Delta$ <i>crvA</i>                                            | This study |

| ZG1644   | (Vc) <i>crvA-msfGFP; ΔcrvB</i>                                                            | This study |
|----------|-------------------------------------------------------------------------------------------|------------|
| ZG1645   | (Vc) <i>crvA-msfGFP; ΔcrvB; VC1378::P<sub>bad</sub>-crvB</i>                              | This study |
| ZG1646   | (Vc) <i>crvBΔNTD (Δ24-359)</i>                                                            | This study |
| ZG1647   | (Vc) <i>crvBΔCBS(Δ371-605)</i>                                                            | This study |
| ZG1648   | (Vc) <i>ΔcrvB; crvA-CBS(crvB 371-605) (1x crvA<sub>CBS</sub>)</i>                         | This study |
| ZG1783   | (Vc) <i>crvB:: crvA-CBS(crvB 371-605); crvA-CBS(crvB 371-605) (2x crvA<sub>CBS</sub>)</i> | This study |
| ZG1649   | (Vc) <i>crvA-CBS-msfGFP</i>                                                               | This study |
| ZG1650   | <i>A. fischeri</i> ES114                                                                  | 57         |
| ZG1651   | <i>A. fischeri</i> <i>ΔcrvY</i>                                                           | This study |
| ZG1652   | (Vc) <i>ΔcrvAB+pEVS143::P<sub>bad</sub>-crvY</i>                                          | This study |
| ZG1776   | (Vc) <i>ΔcrvB; VC1378::P<sub>bad</sub>-crvB-msfGFP</i>                                    | This study |
| ZG1777   | (Vc) <i>ΔmrcA (pbp1A)</i>                                                                 | This study |
| ZG1778   | (Vc) <i>ΔmrcB(pbp1B)</i>                                                                  | This study |
| ZG1779   | (Ec) MG1655+pEVS143::P <sub>tet</sub> - <i>crvA-msfGFP</i>                                | This study |
| ZG1780   | (Ec) MG1655+pEVS143::P <sub>tet</sub> - <i>crvA-msfGFP; crvB</i>                          | This study |
| ZG1781   | (Ec) MG1655+pEVS143::P <sub>tet</sub> - <i>crvB-msfGFP</i>                                | This study |
| ZG1782   | (Ec) MG1655+pEVS143::P <sub>tet</sub> - <i>crvA; crvB-msfGFP</i>                          | This study |
| ZG1787   | (Vc) C6706+pEVS143::P <sub>tet</sub> - <i>crvAB</i>                                       |            |
| ZG1788   | (Vc) C6706+pEVS143::P <sub>tet</sub> - <i>crvA-msfGFP; crvB</i>                           |            |
| Plasmid  | Description                                                                               | Source     |
| pKAS32   | Allelic exchange vector used for <i>V. cholerae</i> chromosomal mutations                 | 36         |
| pRE112   | Allelic exchange vector used for <i>A. fischeri</i> chromosomal mutations                 | 37         |
| pEVS143  | Expression vector used in <i>V. cholerae</i> and <i>E. coli</i>                           | 58         |
| pUCP18   | Expression vector used in <i>P. aeruginosa</i>                                            | 59         |
| pRXMCS-6 | Expression vector used in <i>C. crescentus</i> and <i>A. tumefaciens</i>                  | 60         |

2 (Vc): *V. cholerae*, (Ec): *E. coli*, (Pa): *P. aeruginosa*, (Cc): *C. crescentus* (At): *A. tumefaciens*, EV: Empty vector

3 **Supplementary Table 2(separate file).** Genomic accession numbers, *crv* protein accession  
4 numbers, and clade labels for each of 921 Vibrionaceae genomes. Clade labels are listed in  
5 Extended Data Figures 4C and S4D. Excel file with two header rows and 921 data rows. Column

6 names (first header row) and descriptions of the data in each column (second header row) are  
7 included for each of the 17 columns.

8 **Supplementary Table 3(separate file).** Table of p-values from statistical tests represented as  
9 symbols in figures.

10

11 **Supplementary Video 1.**

12 Time lapse of intact CrvA-mCherry/CrvB-GFP structure in *V. cholerae* cell from Extended Data  
13 Figure 4B. The fluorescent structure remains intact throughout the time course and remains  
14 associated with the curved daughter cell from the initial division. Scale bar is 1µm.

15 **Supplementary Video 2.**

16 Time lapse of CrvA-mCherry/CrvB-GFP structures in *V. cholerae* filamented on low melting  
17 point agarose pads containing 5µg/mL cephalixin. As cells filament, CrvAB structures do not re-  
18 localize to regions of high curvature and new CrvAB structures can be seen forming in straight  
19 regions of the cell.

20

21 **Supplementary Video 3.**

22 Time lapse of CrvA-mCherry/CrvB-GFP structures in *V. cholerae* filamented on low melting  
23 point agarose pads containing 5µg/mL cephalixin. As cells filament, CrvAB structures do not re-  
24 localize to regions of high curvature and new CrvAB structures can be seen forming in straight  
25 regions of the cell.

26 **Supplementary Video 4.**

27 Time lapse of CrvA-mCherry/CrvB-GFP structures in *V. cholerae* recapitulating dynamics of  
28 population curvature and CrvAB localization observed in time courses from liquid culture. Filled  
29 green arrows point to specific CrvA-mCherry/CrvB-GFP structures of interest and outlined green  
30 arrows indicate the position of cells before those structures have formed.  
31
